# Supplementary material for: Towards clinically actionable digital phenotyping targets in schizophrenia
Source: PubMed Central journal article supplement (PMC7200667; doi:10.1038/s41537-020-0100-1), 2020-05-05
Supplement: 41537_2020_100_MOESM2_ESM.pdf [file 41537_2020_100_MOESM2_ESM.pdf]

1 **Supplementary Methods**

2 Hierarchical Clustering

3 To further interpret the correlation results between the SZ and HC and identify patterns in  
 4 how certain features might be grouped together, we performed hierarchical clustering,<sup>1</sup> which  
 5 begins with individual feature groups and iteratively aggregates similar features. Results of the  
 6 cluster analysis are shown below. In both groups, sociability features generally clustered together  
 7 whereas mobility features were distributed across all clusters. Active data features clustered  
 8 more closely together in HC than SZ.

9 **Feature Clusters in SZ. Blue = Passive Mobility, Green = Passive Sociability, and Red =**  
 10 **Active**

|                                                                                                                                                                                                                                                                                                                                                |                                                                                                |
|------------------------------------------------------------------------------------------------------------------------------------------------------------------------------------------------------------------------------------------------------------------------------------------------------------------------------------------------|------------------------------------------------------------------------------------------------|
| <u>Cluster 1</u><br>Hometime, ProbPause, MinsMissing, CirdnRtn,<br>WkEndDayRtn, text_responsiveness, sleep, medication                                                                                                                                                                                                                         | <u>Cluster 2</u><br>DistTravelled, RoG, MaxDiam,<br>MaxHomeDist, AvgFlightLen,<br>StdFlightLen |
| <u>Cluster 3</u><br>SigLocsVisited, SigLocEntropy, outgoing_texts,<br>outgoing_textlengths, text_outdegree, incoming_texts<br>incoming_textlengths, text_indegree, text_reciprocity,<br>outgoing_calls, outgoing_calllengths, call_outdegree,<br>incoming_calls, incoming_calllengths, call_indegree,<br>call_reciprocity, call_responsiveness | <u>Cluster 4</u><br>AvgFlightDur, StdFlightDur, social,<br>psychosis, depression, anxiety      |

11

12 **Feature Clusters in HC. Blue = Passive Mobility, Green = Passive Sociability, and Red =**  
 13 **Active**

|                                                                                                                                                                                                                                                                                                                                                                              |                                                                                                                                                                                            |
|------------------------------------------------------------------------------------------------------------------------------------------------------------------------------------------------------------------------------------------------------------------------------------------------------------------------------------------------------------------------------|--------------------------------------------------------------------------------------------------------------------------------------------------------------------------------------------|
| <u>Cluster 1</u><br>Hometime, ProbPause, MinsMissing, CirdnRtn,<br>WkEndDayRtn, outgoing_texts, outgoing_textlengths,<br>text_outdegree, incoming_texts, incoming_textlengths,<br>text_indegree, text_reciprocity, outgoing_calls,<br>outgoing_calllengths, call_outdegree, incoming_calls,<br>incoming_calllengths, call_indegree, call_reciprocity,<br>call_responsiveness | <u>Cluster 2</u><br>DistTravelled, RoG, MaxDiam,<br>SigLocsVisited, AvgFlightLen,<br>StdFlightLen, SigLocEntropy,<br>text_responsiveness, sleep, social,<br>psychosis, depression, anxiety |
| <u>Cluster 3</u><br>MaxHomeDist                                                                                                                                                                                                                                                                                                                                              | <u>Cluster 4</u><br>AvgFlightDur, StdFlightDur                                                                                                                                             |

14

15 **References**

16

- 17 1. Ward Jr, J. H. Hierarchical grouping to optimize an objective function. *J. Am. Stat. Assoc.*  
18 **58**, 236–244 (1963).

19
